# Supplementary material
Source: Springer Nature journal article supplement (https://www.springermedizin.de/resource/supplementary/12985_2013_2350_MOESM2_ESM.pdf/9606960)

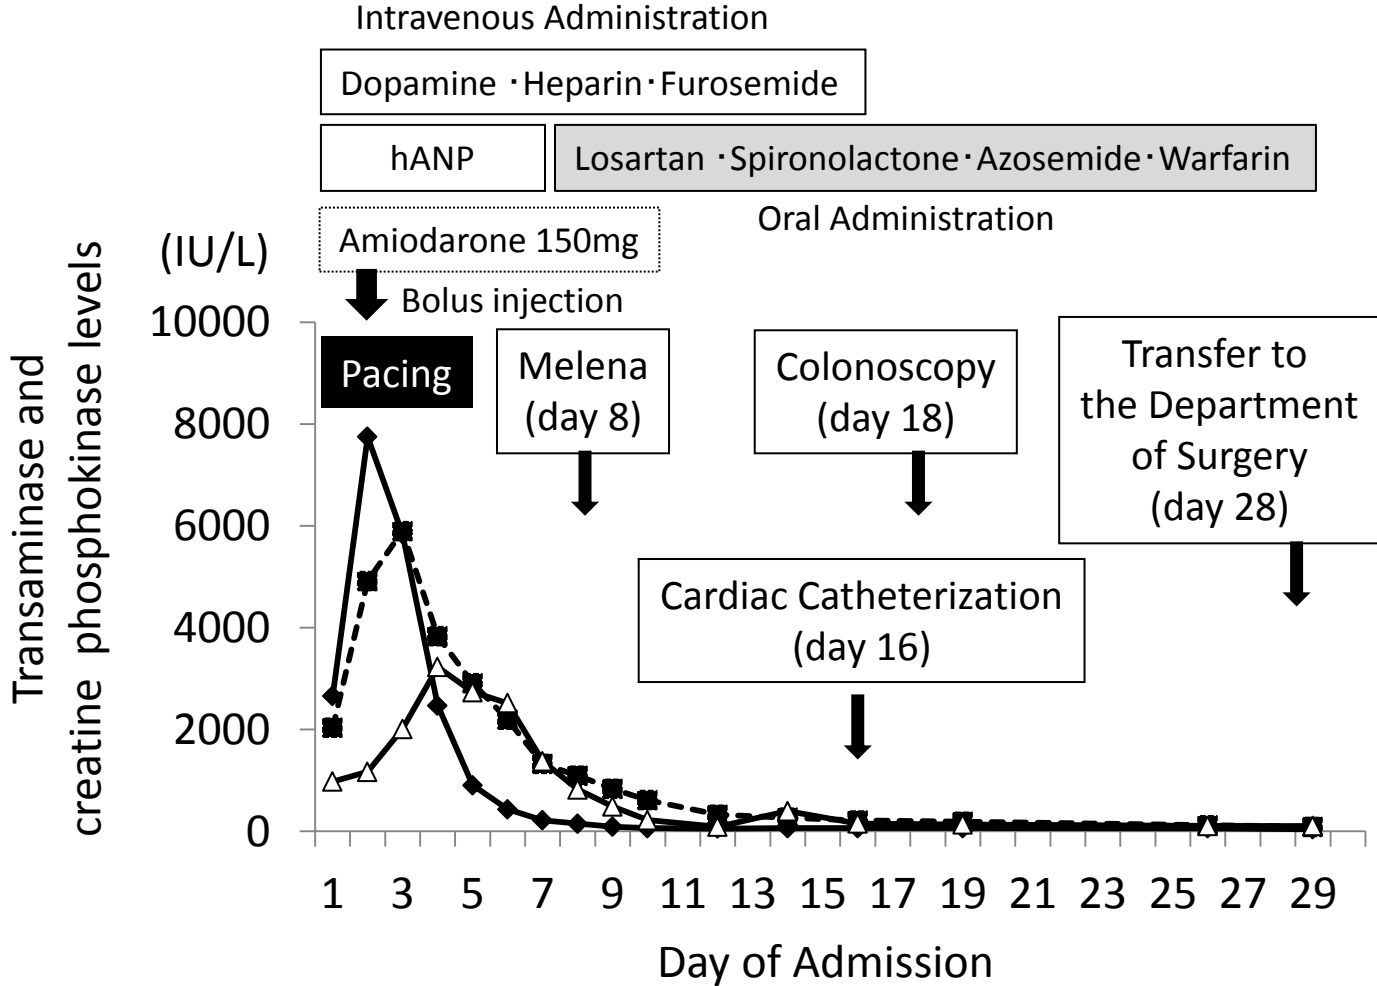

|                   |      |      |      |      |      |      |      |      |
|-------------------|------|------|------|------|------|------|------|------|
| BNP (pg/mL)       | 4806 | 2546 | 1264 | 268  | 275  | 238  | 230  | 224  |
| TnI (ng/mL)       | 28.4 | 4.96 | 1.07 | 0.20 | 0.10 | 0.08 | 0.07 | 0.07 |
| γGTP (IU/L)       | 197  | 162  | 159  | 208  | 188  | 189  | 153  | 137  |
| Creatinine(mg/dL) | 3.01 | 2.65 | 0.90 | 0.92 | 0.95 | 0.90 | 0.93 | 0.90 |

Supplement: MOESM2 [file 9606960]
